# Supplementary material for: Adiposity and Blood Pressure in 110 000 Mexican Adults
Source: PubMed Central journal article supplement (PMC5344187; doi:10.1161/hypertensionaha.116.08791), 2017-03-08
Supplement: hyp-69-608-s001.pdf [file hyp-69-608-s001.pdf]

# Adiposity and blood pressure in 110,000 Mexican adults

## Online Supplement

| <b>Supplementary tables</b>                                                                                                                | <b>Pg</b> |
|--------------------------------------------------------------------------------------------------------------------------------------------|-----------|
| S1. Characteristics at recruitment that might relate to the anthropometric measures among men                                              | 2         |
| S2. Characteristics at recruitment that might relate to the anthropometric measures among women                                            | 3         |
| <br>                                                                                                                                       |           |
| <b>Supplementary figures</b>                                                                                                               |           |
| S1. The anthropometric variables in relation to each other (Men)                                                                           | 4         |
| S2. The anthropometric variables in relation to each other (Women)                                                                         | 5         |
| S3. Association between each adiposity marker and SBP in men                                                                               | 6         |
| S4. Association between each adiposity marker and SBP in women                                                                             | 7         |
| S5. Association between each adiposity marker and DBP                                                                                      | 8         |
| S6. Overall and sex-specific relevance of each adiposity marker to DBP, before and after additional adjustment for other adiposity markers | 9         |
| S7. Association between each adiposity marker and DBP in men                                                                               | 10        |
| S8. Association between each adiposity marker and DBP in women                                                                             | 11        |
| S9. Relevance of body mass index to systolic and diastolic blood pressure at different ages                                                | 12        |

**Table S1: Characteristics at recruitment that might relate to the anthropometric measures among men**

|                                        | Participants | Height, cm | Weight, kg | BMI, kg/m <sup>2</sup> | Waist circ, cm | Hip circ, cm | Waist-hip ratio | Waist-height ratio |
|----------------------------------------|--------------|------------|------------|------------------------|----------------|--------------|-----------------|--------------------|
| District                               |              |            |            |                        |                |              |                 |                    |
| Iztapalapa                             | 21575        | 164 (6)    | 76 (11)    | 28.1 (4.0)             | 96 (10)        | 101 (7)      | 0.95 (0.05)     | 0.59 (0.06)        |
| Coyoacan                               | 16763        | 165 (6)    | 75 (11)    | 27.5 (4.0)             | 95 (10)        | 101 (7)      | 0.94 (0.06)     | 0.58 (0.06)        |
| Education                              |              |            |            |                        |                |              |                 |                    |
| University/College                     | 9882         | 167 (6)    | 75 (12)    | 27.6 (4.2)             | 96 (10)        | 102 (8)      | 0.94 (0.06)     | 0.57 (0.06)        |
| High school                            | 10499        | 165 (6)    | 76 (11)    | 27.8 (4.1)             | 96 (10)        | 101 (8)      | 0.95 (0.06)     | 0.58 (0.06)        |
| Elementary school                      | 14806        | 164 (6)    | 76 (11)    | 28.0 (4.1)             | 96 (10)        | 101 (8)      | 0.95 (0.06)     | 0.59 (0.06)        |
| Other                                  | 3151         | 163 (6)    | 75 (12)    | 27.7 (4.3)             | 95 (10)        | 100 (8)      | 0.96 (0.06)     | 0.59 (0.06)        |
| Smoking                                |              |            |            |                        |                |              |                 |                    |
| Never                                  | 7880         | 164 (6)    | 76 (11)    | 27.9 (4.1)             | 96 (10)        | 101 (8)      | 0.95 (0.06)     | 0.58 (0.06)        |
| Former                                 | 12539        | 165 (6)    | 77 (11)    | 28.2 (4.1)             | 97 (10)        | 102 (7)      | 0.95 (0.06)     | 0.59 (0.06)        |
| Current                                | 17919        | 165 (6)    | 75 (11)    | 27.5 (4.1)             | 95 (10)        | 100 (8)      | 0.95 (0.06)     | 0.58 (0.06)        |
| Regular recreational physical activity |              |            |            |                        |                |              |                 |                    |
| None                                   | 26692        | 165 (6)    | 76 (11)    | 28.0 (4.0)             | 96 (10)        | 101 (7)      | 0.95 (0.05)     | 0.59 (0.06)        |
| Up to twice a week                     | 5611         | 165 (6)    | 75 (11)    | 27.5 (4.1)             | 95 (10)        | 101 (7)      | 0.94 (0.06)     | 0.57 (0.06)        |
| At least three times a week            | 6035         | 165 (6)    | 75 (11)    | 27.4 (4.1)             | 94 (10)        | 100 (8)      | 0.94 (0.06)     | 0.57 (0.06)        |
| Alcohol consumption                    |              |            |            |                        |                |              |                 |                    |
| Never                                  | 2277         | 165 (6)    | 75 (11)    | 27.5 (4.1)             | 95 (10)        | 100 (8)      | 0.94 (0.06)     | 0.58 (0.06)        |
| Former                                 | 3574         | 165 (6)    | 76 (11)    | 28.0 (4.0)             | 96 (10)        | 101 (7)      | 0.95 (0.05)     | 0.58 (0.06)        |
| Current                                | 32487        | 165 (6)    | 76 (11)    | 27.8 (4.0)             | 96 (10)        | 101 (7)      | 0.95 (0.05)     | 0.58 (0.06)        |

Mean (SD) shown. BMI=Body mass index. Estimates are adjusted for age and each of the other risk factors listed.

**Table S2: Characteristics at recruitment that might relate to the anthropometric measures among women**

|                                        | Participants | Height, cm | Weight, kg | BMI, kg/m <sup>2</sup> | Waist circ, cm | Hip circ, cm | Waist-hip ratio | Waist-height ratio |
|----------------------------------------|--------------|------------|------------|------------------------|----------------|--------------|-----------------|--------------------|
| District                               |              |            |            |                        |                |              |                 |                    |
| Iztapalapa                             | 45235        | 152 (5)    | 68 (11)    | 29.6 (4.8)             | 93 (11)        | 106 (10)     | 0.88 (0.06)     | 0.61 (0.07)        |
| Coyoacan                               | 28338        | 152 (5)    | 66 (11)    | 28.6 (4.9)             | 90 (11)        | 105 (10)     | 0.86 (0.06)     | 0.60 (0.07)        |
| Education                              |              |            |            |                        |                |              |                 |                    |
| University/College                     | 10059        | 155 (6)    | 65 (12)    | 27.9 (5.0)             | 89 (11)        | 104 (11)     | 0.85 (0.06)     | 0.58 (0.08)        |
| High school                            | 20059        | 153 (6)    | 67 (12)    | 28.8 (5.0)             | 91 (11)        | 105 (11)     | 0.86 (0.06)     | 0.60 (0.08)        |
| Elementary school                      | 34554        | 151 (6)    | 68 (11)    | 29.7 (4.9)             | 93 (11)        | 106 (11)     | 0.88 (0.06)     | 0.62 (0.07)        |
| Other                                  | 8901         | 150 (6)    | 68 (12)    | 29.8 (5.2)             | 94 (12)        | 105 (11)     | 0.89 (0.06)     | 0.63 (0.08)        |
| Smoking                                |              |            |            |                        |                |              |                 |                    |
| Never                                  | 44920        | 151 (5)    | 67 (11)    | 29.2 (4.9)             | 92 (11)        | 105 (11)     | 0.87 (0.06)     | 0.61 (0.07)        |
| Former                                 | 12278        | 152 (5)    | 68 (11)    | 29.5 (4.8)             | 93 (11)        | 106 (10)     | 0.87 (0.06)     | 0.61 (0.07)        |
| Current                                | 16375        | 153 (6)    | 67 (11)    | 29.0 (4.9)             | 92 (11)        | 105 (11)     | 0.87 (0.06)     | 0.60 (0.07)        |
| Regular recreational physical activity |              |            |            |                        |                |              |                 |                    |
| None                                   | 60146        | 152 (5)    | 68 (11)    | 29.4 (4.8)             | 93 (11)        | 106 (10)     | 0.87 (0.06)     | 0.61 (0.07)        |
| Up to twice a week                     | 3801         | 153 (5)    | 66 (11)    | 28.5 (4.8)             | 90 (11)        | 104 (10)     | 0.87 (0.06)     | 0.59 (0.07)        |
| At least three times a week            | 9626         | 153 (6)    | 66 (11)    | 28.5 (4.9)             | 90 (11)        | 104 (11)     | 0.86 (0.06)     | 0.59 (0.07)        |
| Alcohol consumption                    |              |            |            |                        |                |              |                 |                    |
| Never                                  | 18444        | 152 (6)    | 67 (11)    | 29.0 (4.9)             | 92 (11)        | 105 (11)     | 0.87 (0.06)     | 0.61 (0.07)        |
| Former                                 | 3537         | 152 (5)    | 67 (11)    | 29.2 (4.8)             | 92 (11)        | 106 (10)     | 0.87 (0.06)     | 0.61 (0.07)        |
| Current                                | 51592        | 152 (5)    | 68 (11)    | 29.3 (4.8)             | 92 (11)        | 106 (10)     | 0.87 (0.06)     | 0.61 (0.07)        |

Mean (SD) shown. BMI=Body mass index. Estimates are adjusted for age and each of the other risk factors listed.

**Figure S1: The anthropometric variables in relation to each other**

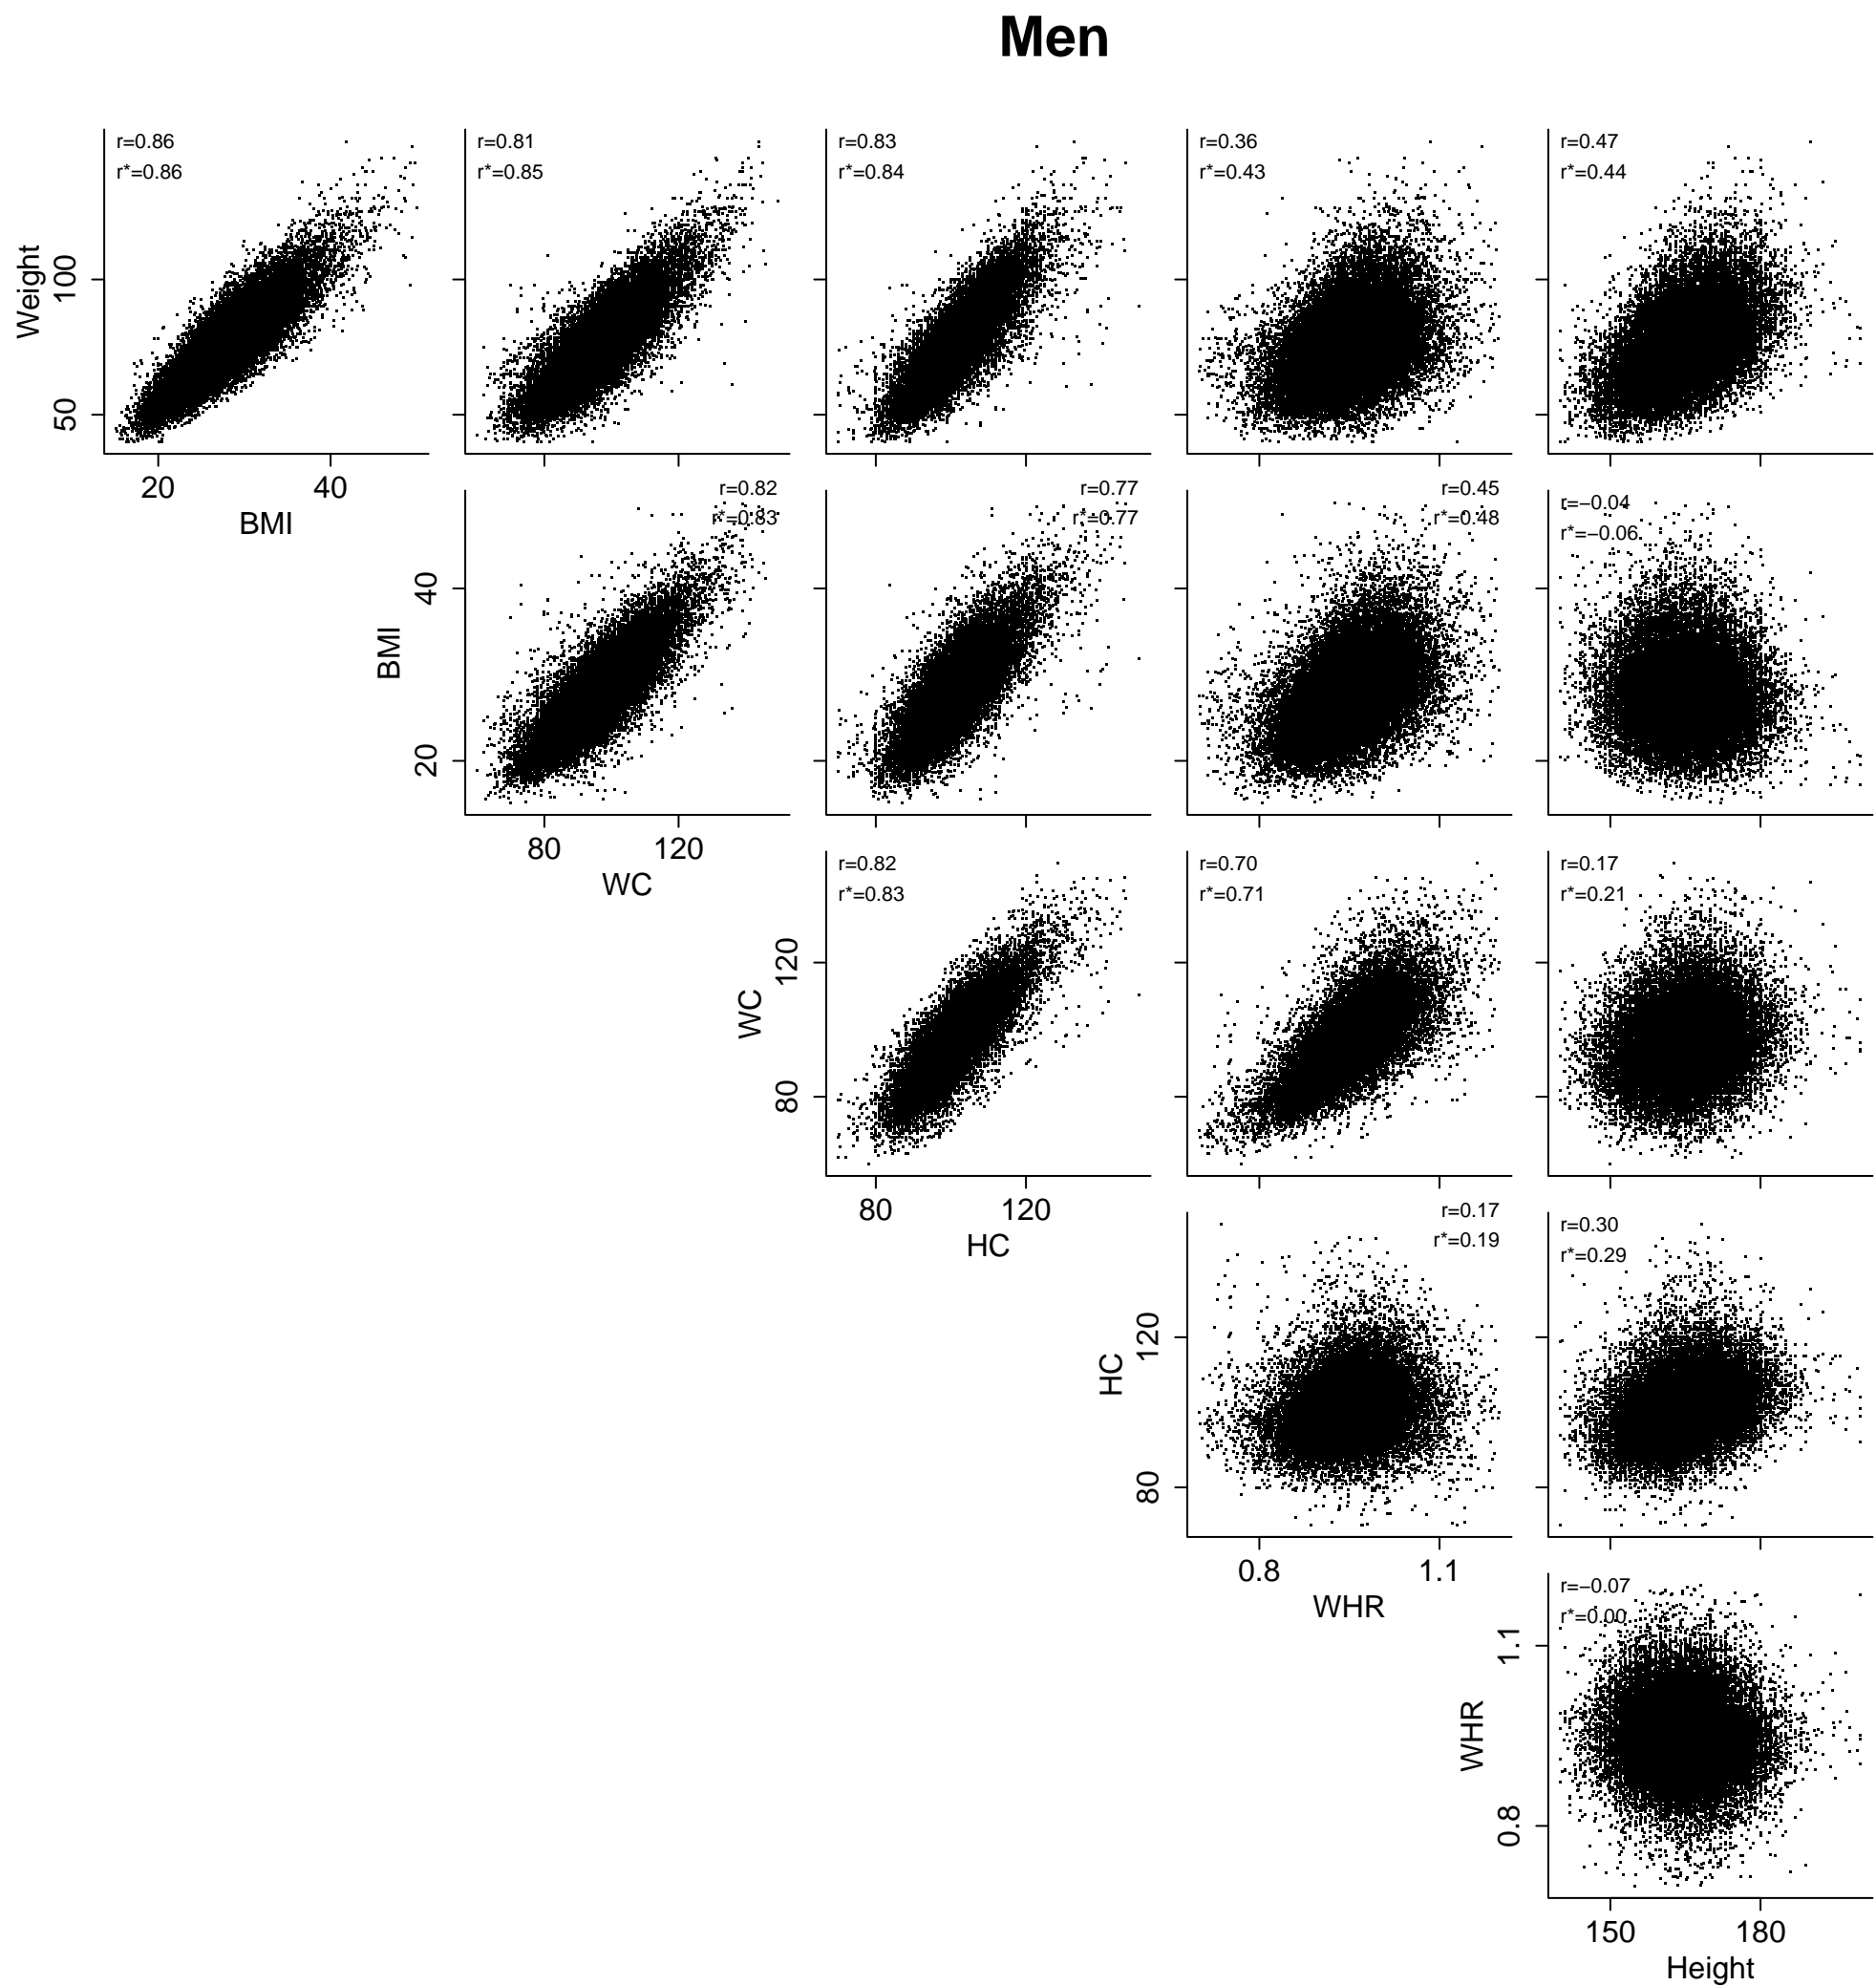

r = Pearson correlation coefficient  
r\* = partial (Pearson) correlation coefficient adjusted for age

**Figure S2: The anthropometric variables in relation to each other**

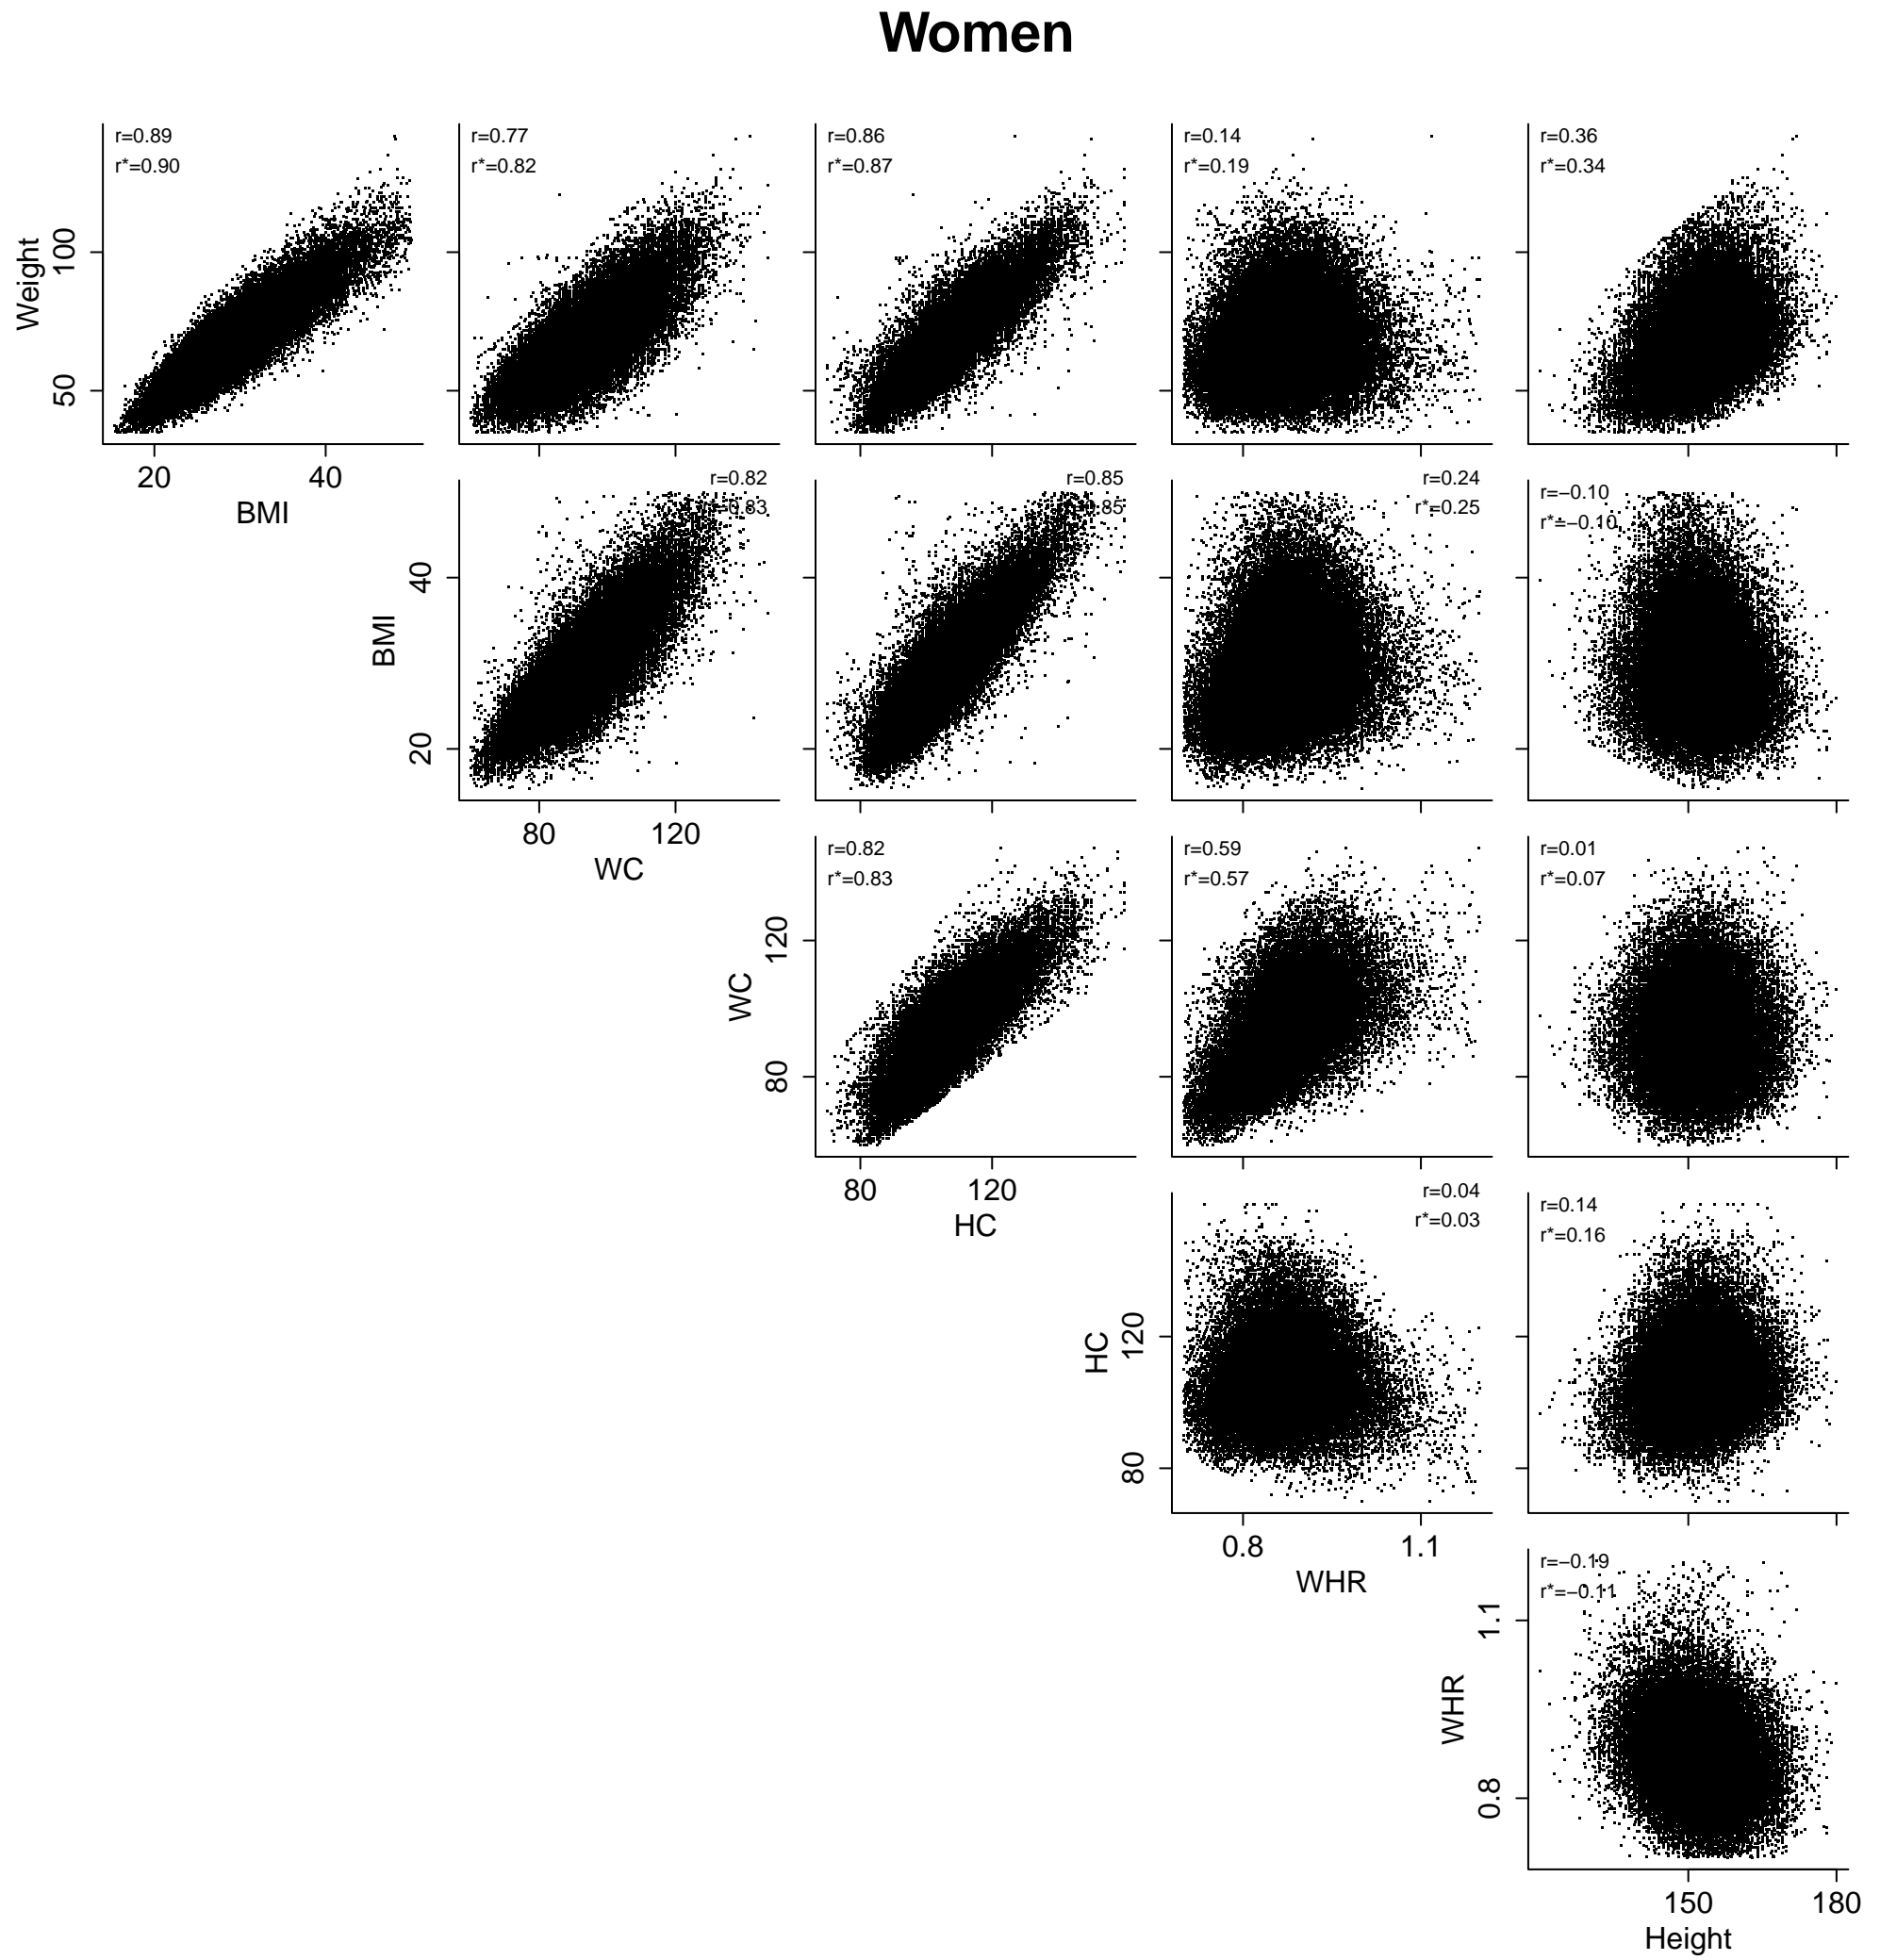

r = Pearson correlation coefficient  
r\* = partial (Pearson) correlation coefficient adjusted for age

**Figure S3: Association between each adiposity marker and SBP in men**

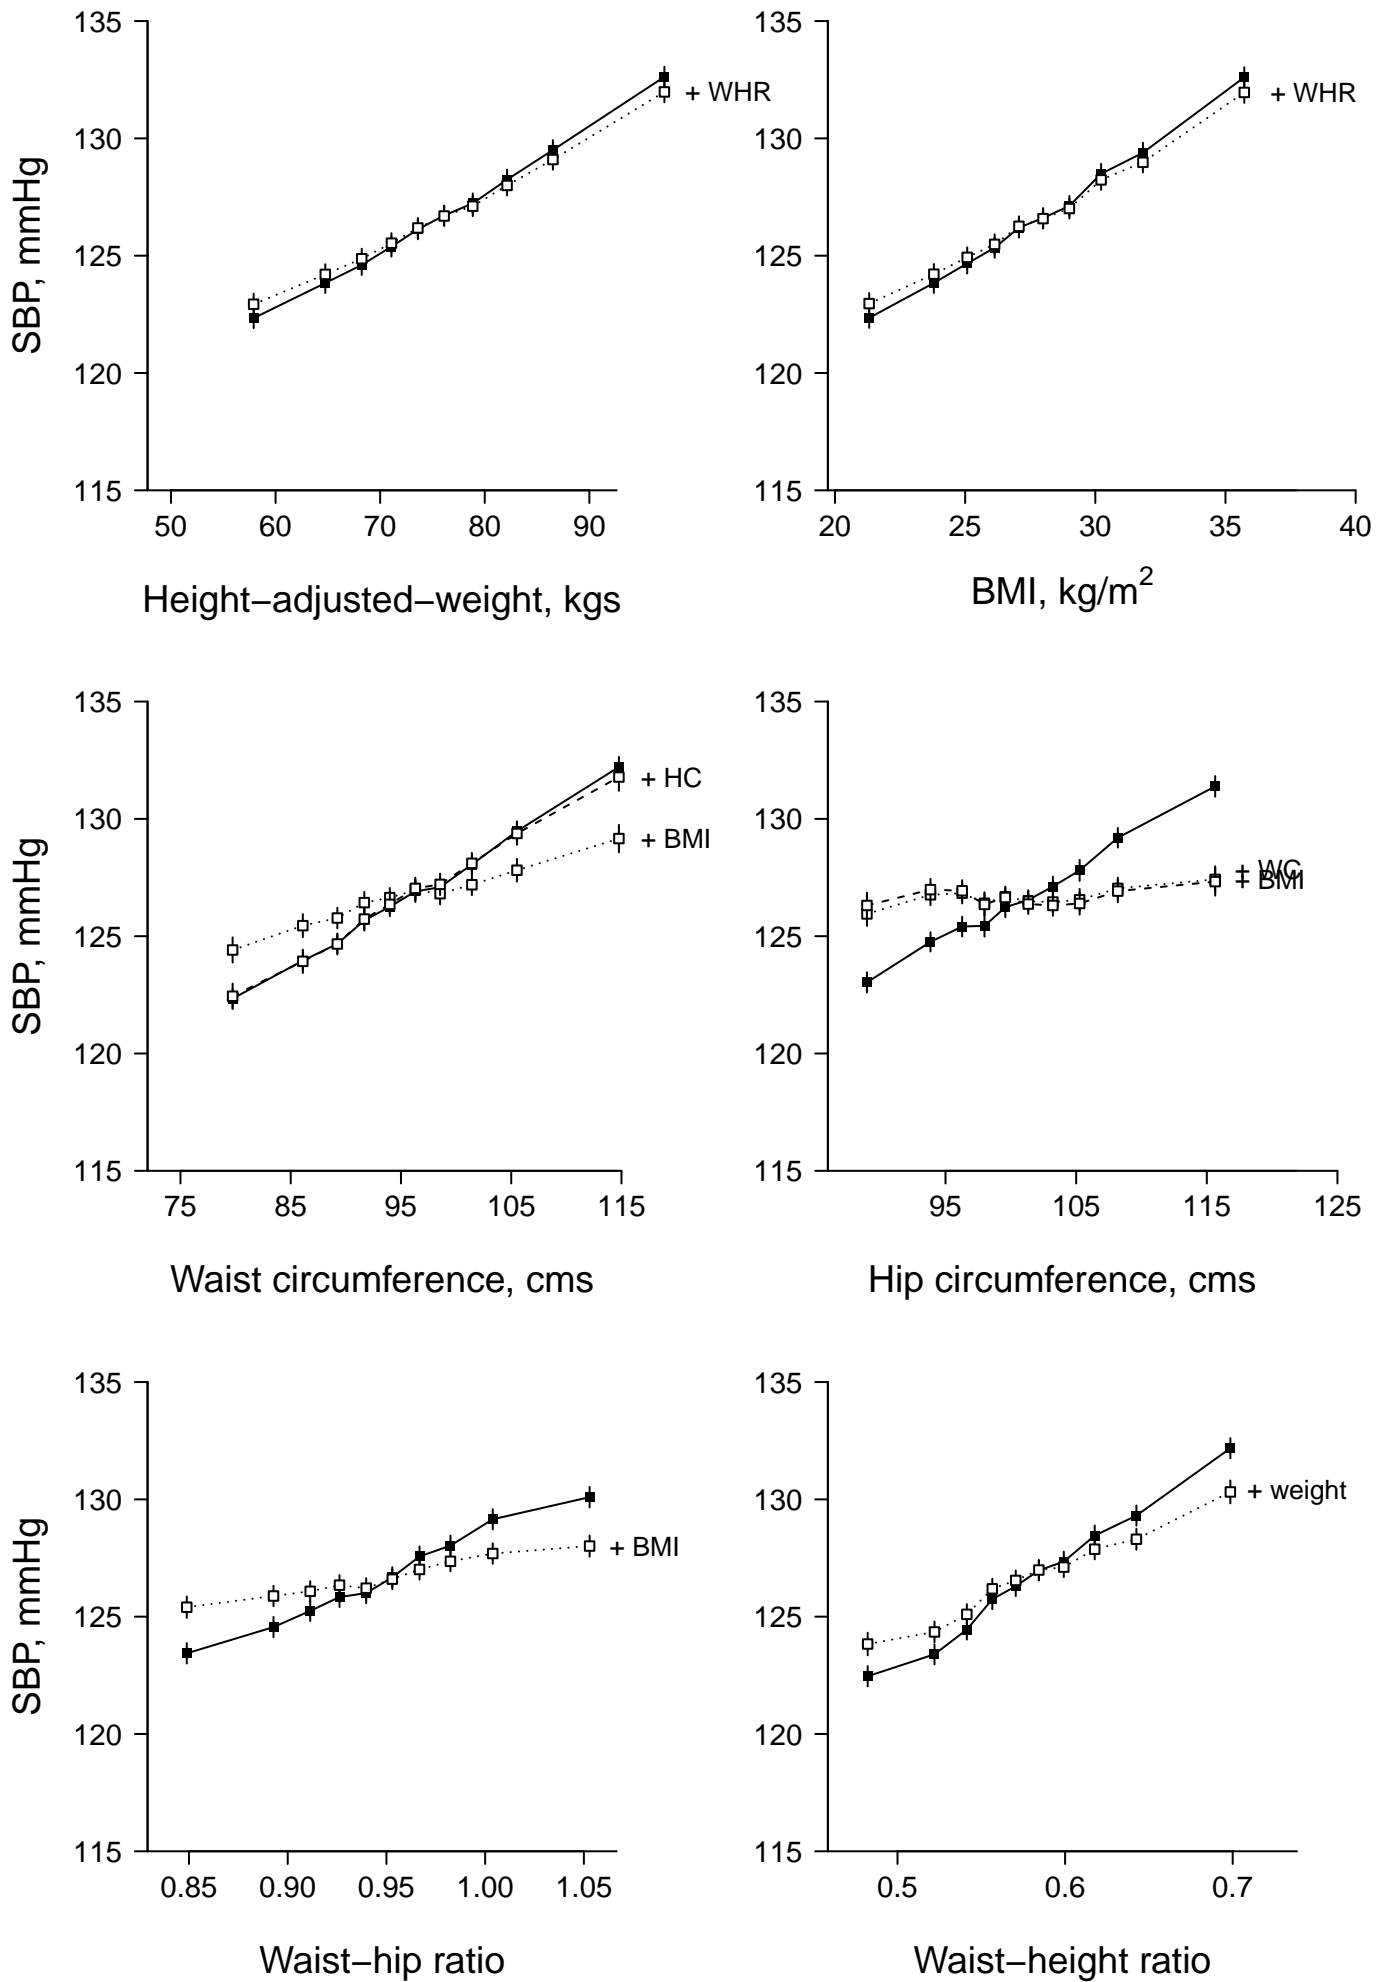

Adjustments, exclusions, axes and abbreviations as for Figure 1 in the main manuscript.

**Figure S4: Association between each adiposity marker and SBP in women**

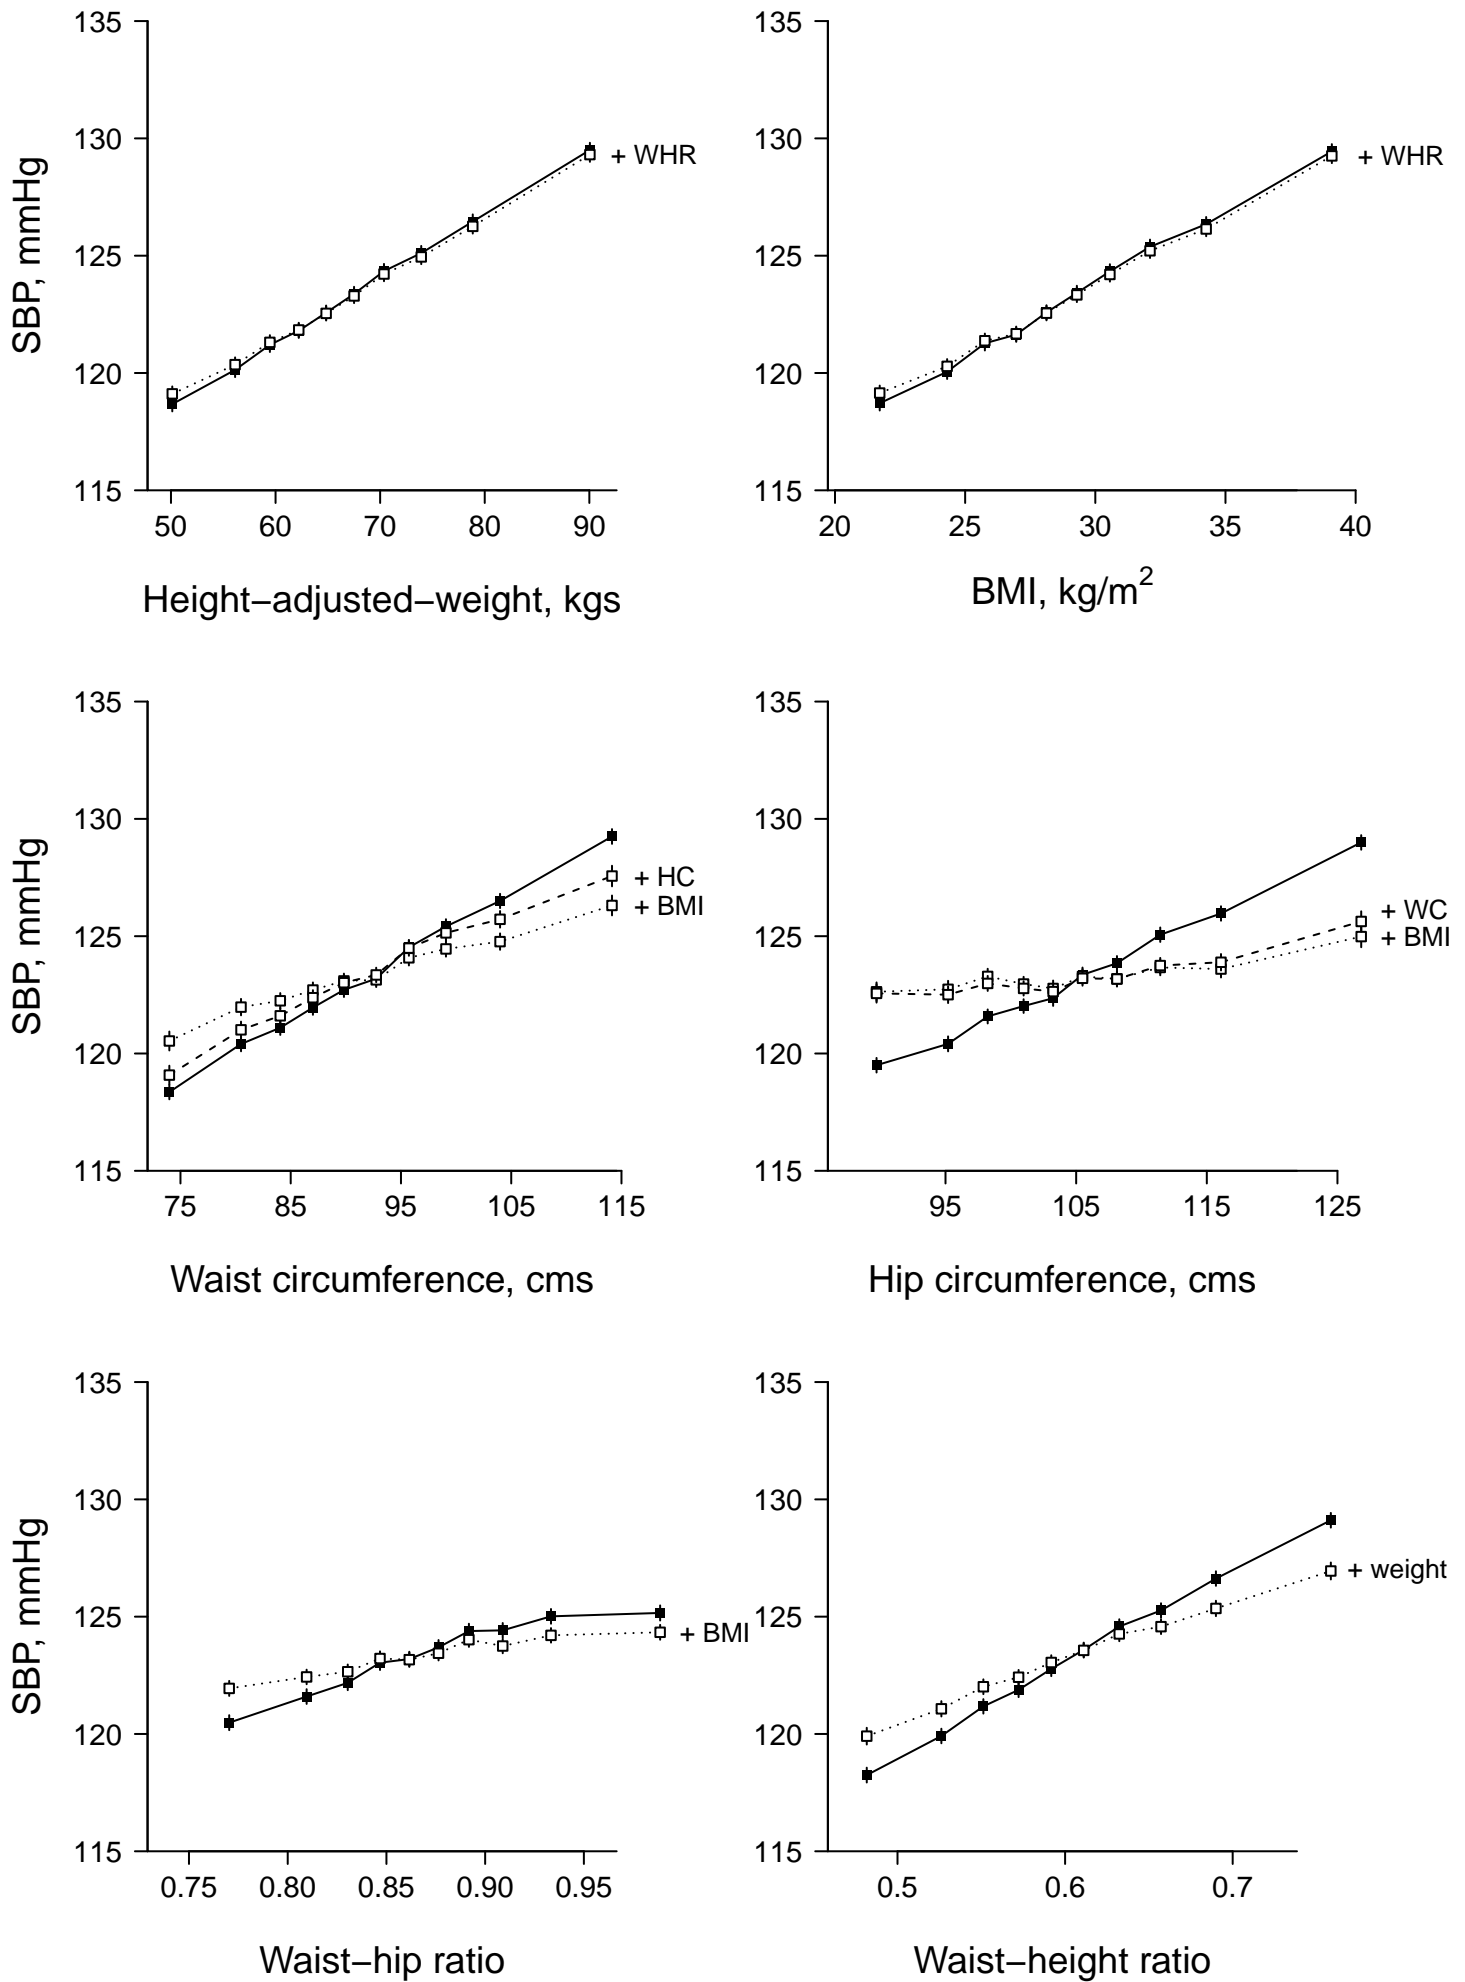

Adjustments, exclusions, axes and abbreviations as for Figure 1 in the main manuscript.

**Figure S5: Association between each adiposity marker and DBP**

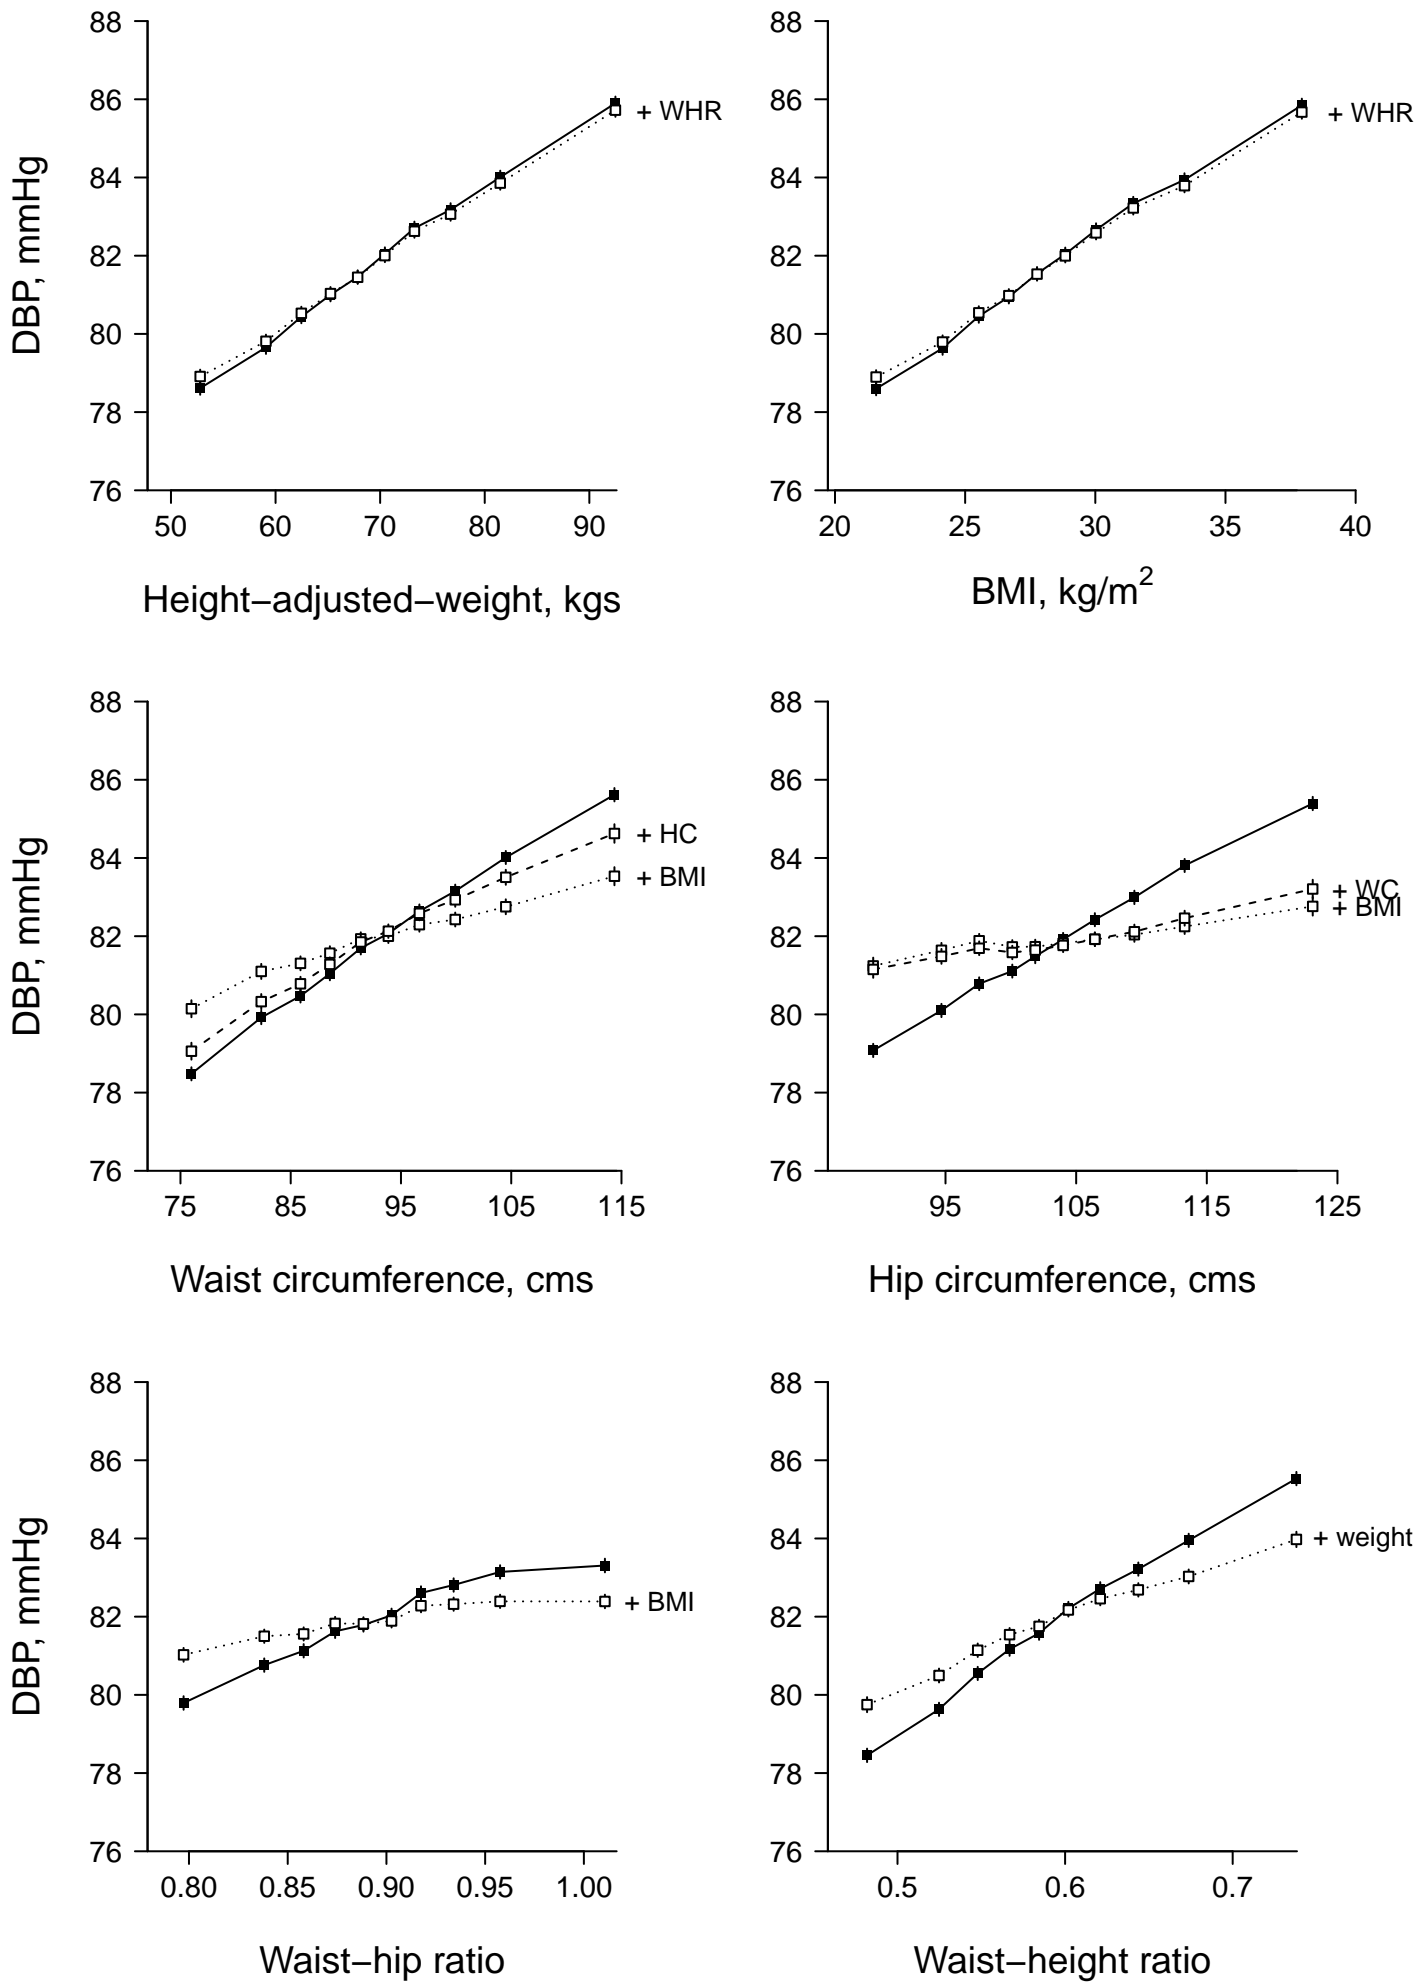

Adjustments, exclusions, axes and abbreviations as for Figure 1 in the main manuscript.



**Figure S6: Overall and sex-specific relevance of each adiposity marker to DBP, before and after additional adjustment for other adiposity markers**

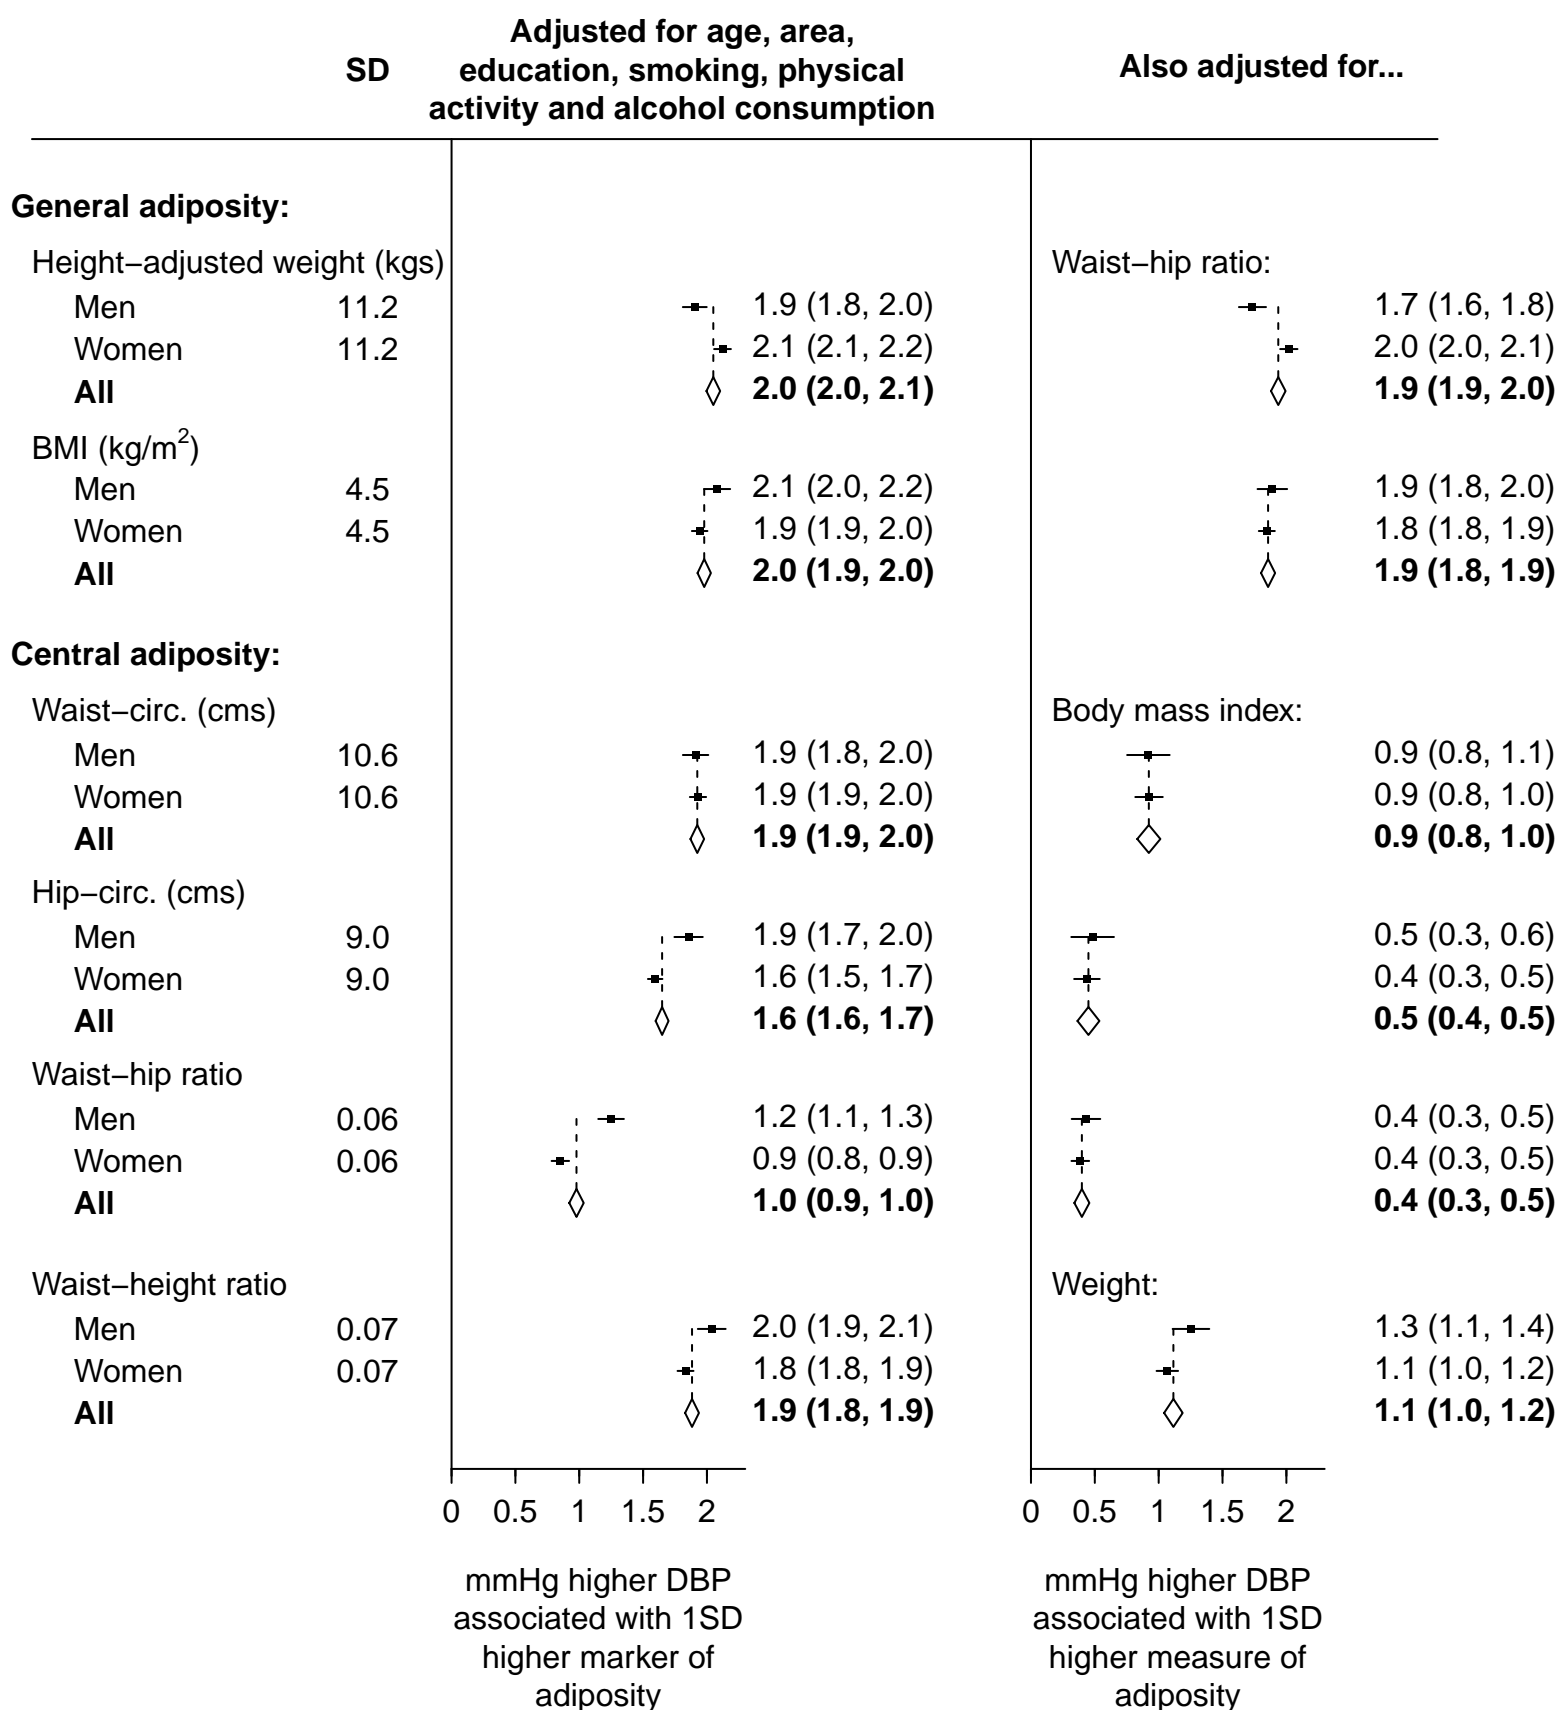

Each diamond represents the inverse-variance-weighted average of the two estimates above it. For each marker of adiposity, the SD shown is the average of the SD in men and the SD in women (see Table 1 for the age- and sex-specific values). Values in parentheses are 95% confidence intervals.

**Figure S7: Association between each adiposity marker and DBP in men**

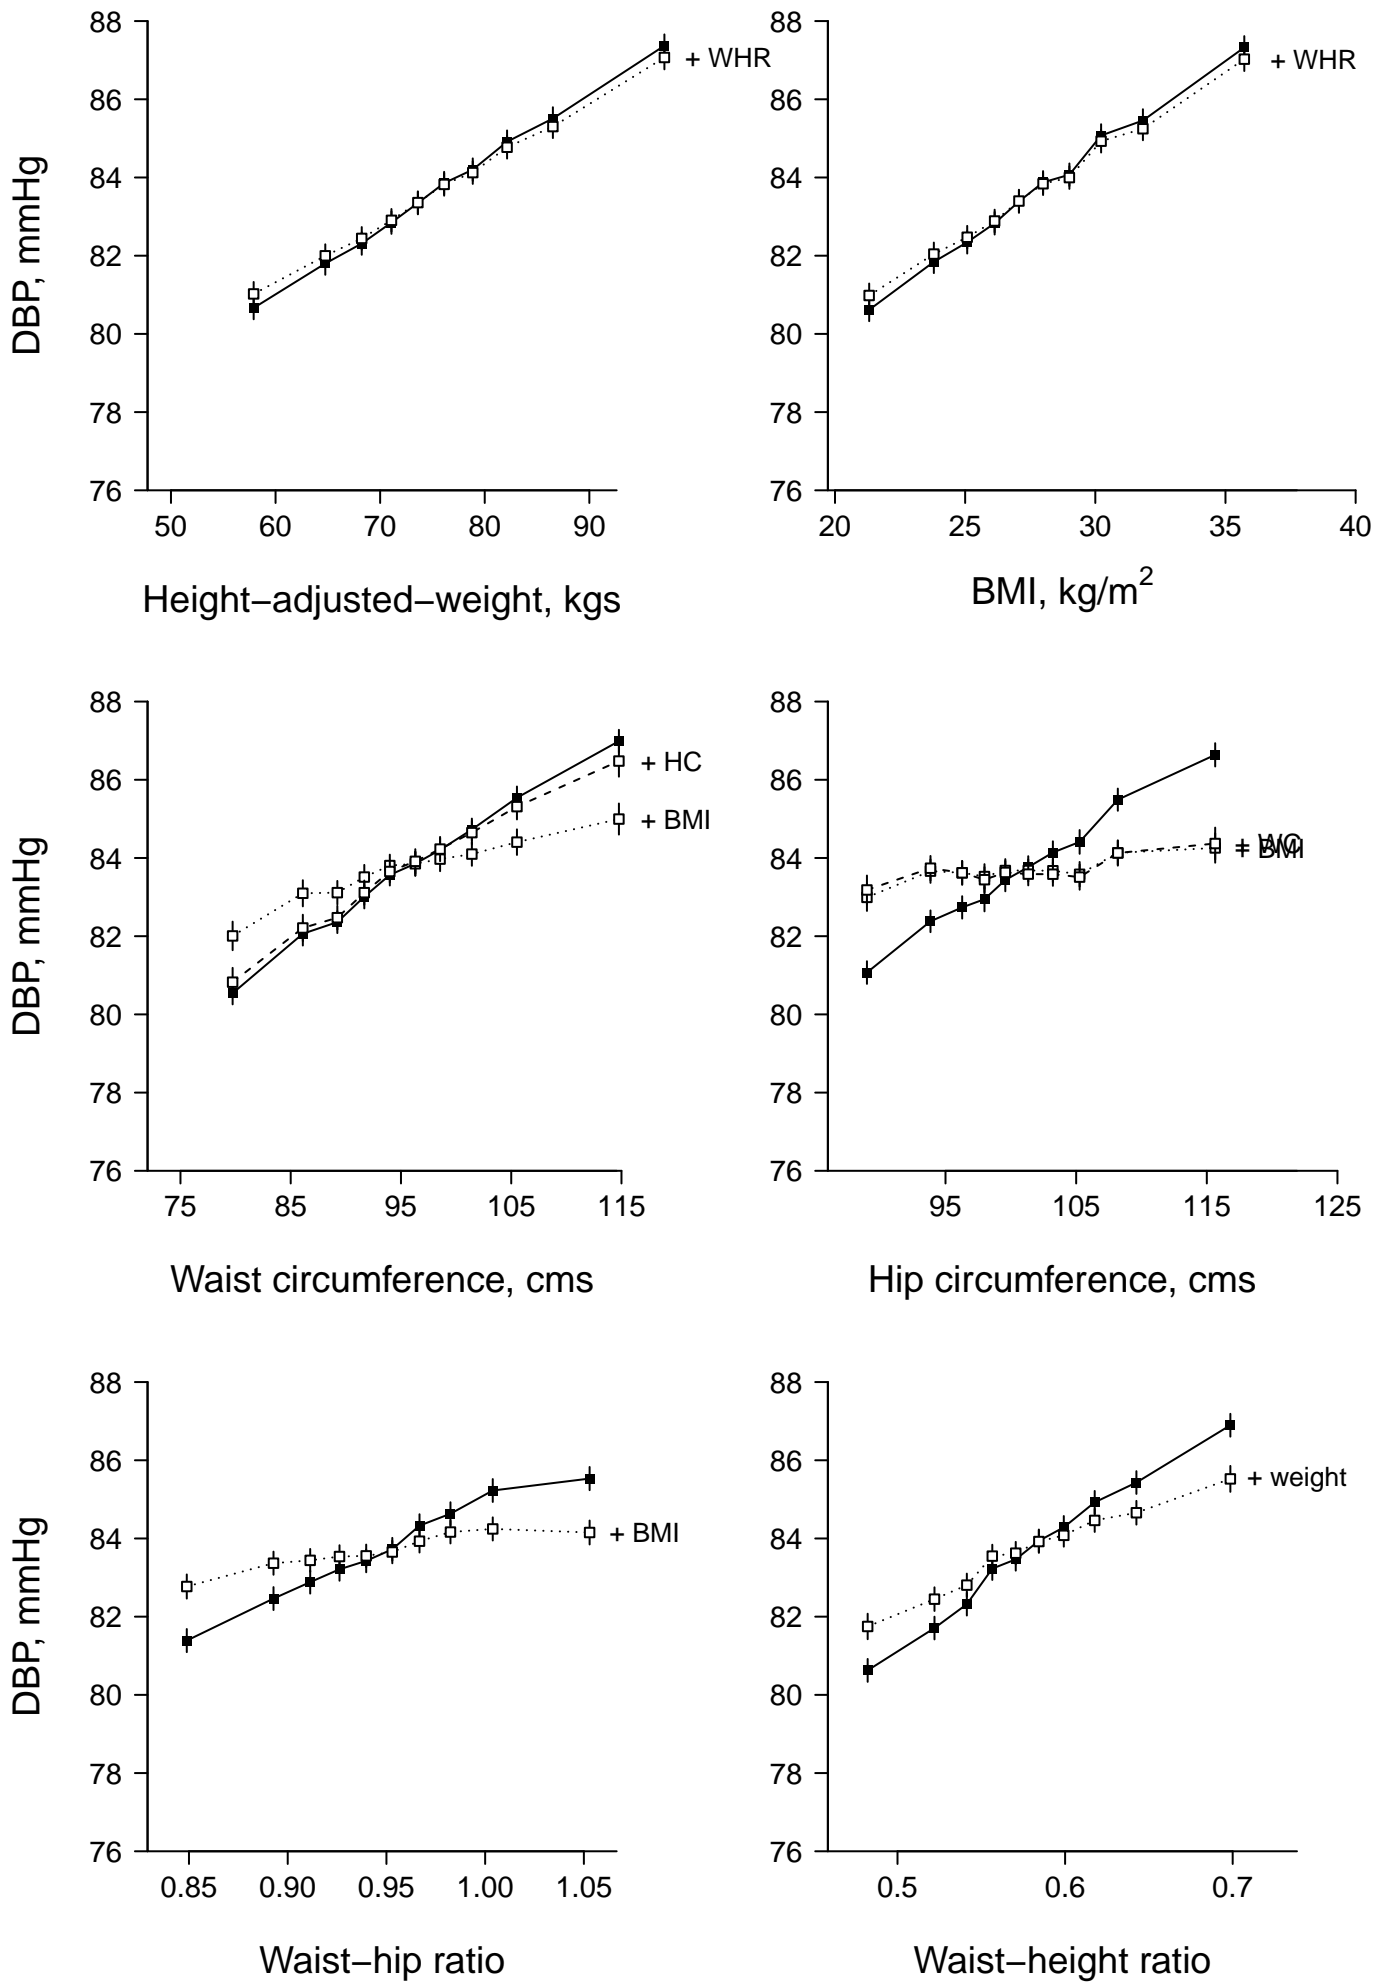

Adjustments, exclusions, axes and abbreviations as for Figure 1 in the main manuscript.

**Figure S8: Association between each adiposity marker and DBP in women**

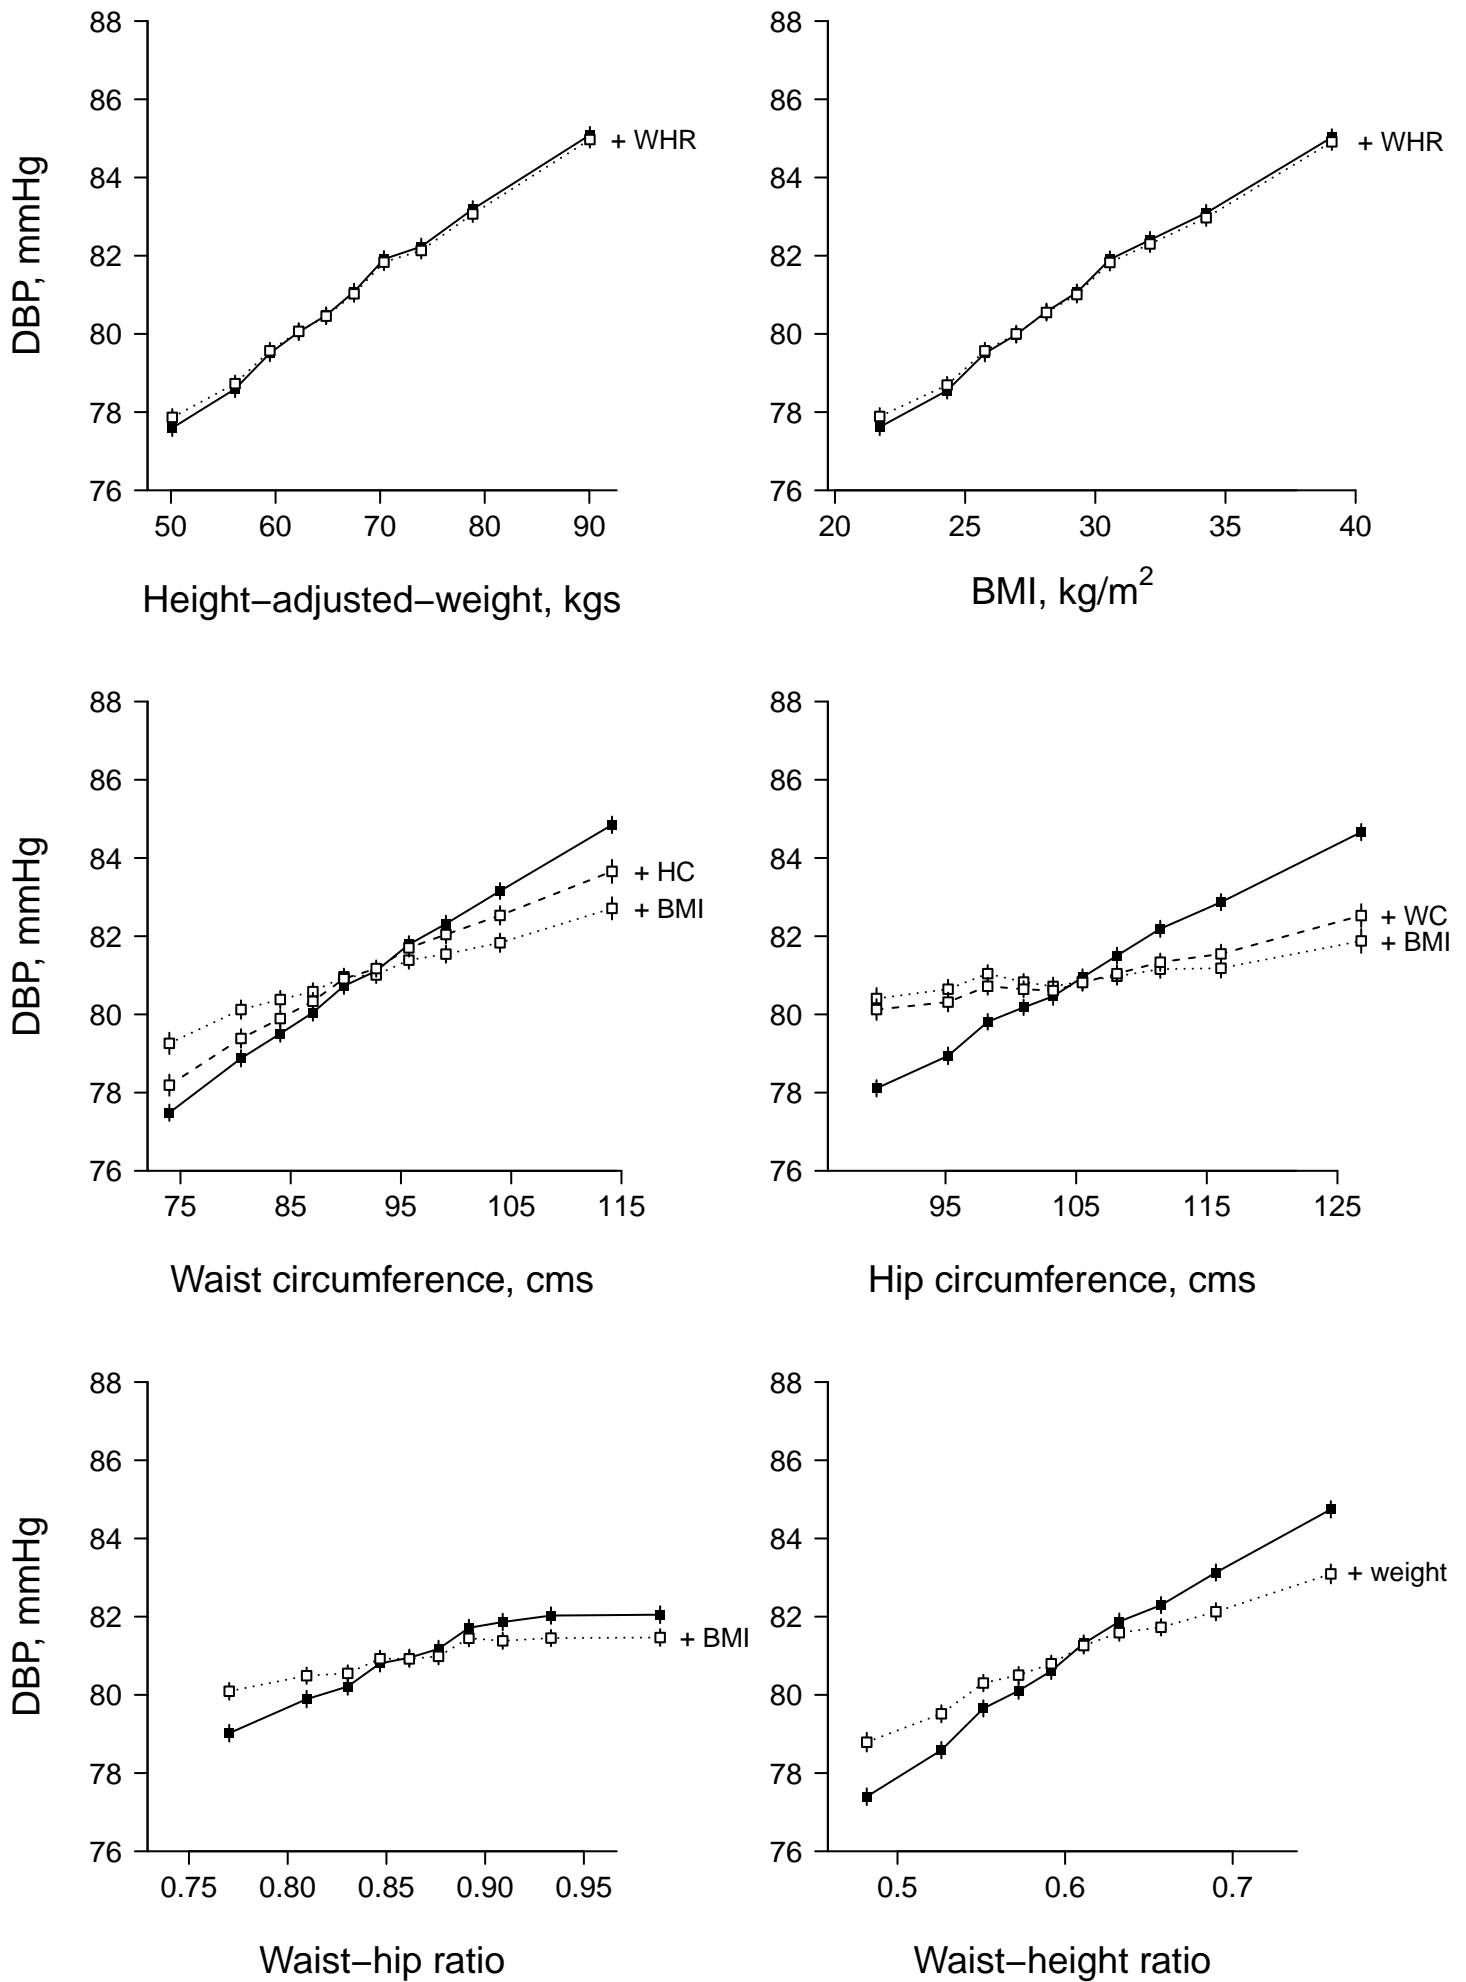

Adjustments, exclusions, axes and abbreviations as for Figure 1 in the main manuscript.

**Figure S9: Relevance of body mass index to systolic and diastolic blood pressure at different ages**

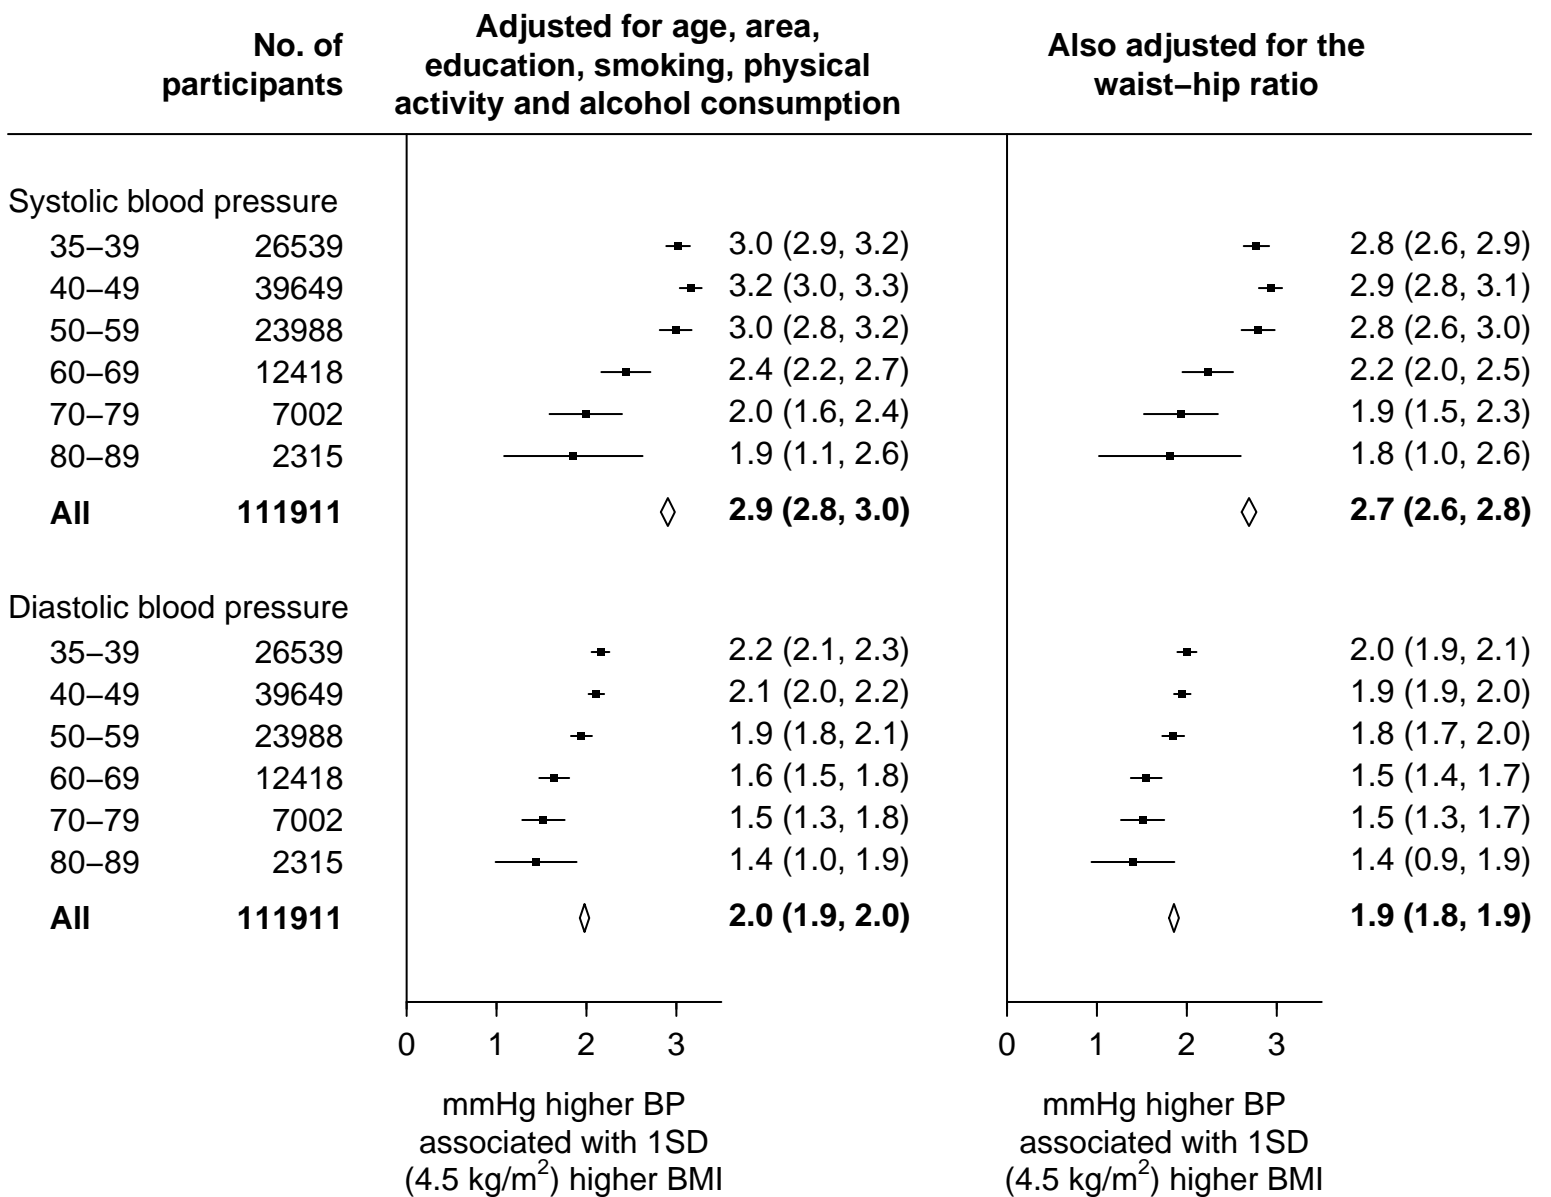

Values in parentheses are 95% confidence intervals
